# Supplementary material for: A novel risk score model based on fourteen chromatin regulators-based genes for predicting overall survival of patients with lower-grade gliomas
Source: Front Genet. 2022 Sep 26;13:957059. doi: 10.3389/fgene.2022.957059 (PMC9554745; doi:10.3389/fgene.2022.957059)
Supplement: Supplementary file 12 [file Table5.XLSX]

## Sheet: Directory index
The intensities of proteins corresponding to some representative signature genes were quantified using the ImageJ software, followed by statistical analysis.
part-1	TRIM24
part-2	IDH1
part-3	LBR
part-4	HMG20B
part-5	USP49
part-6	RCC1
（For details, see excel sheet 1-6.）

## Sheet: part-1 TRIM24
image J-TRIM24
	Label	Area	Mean	StdDev	Min	Max	IntDen	%Area	RawIntDen	MinThr	MaxThr
1	TRIM21.2790.jpeg-(Colour_2)	365282	0.47	0.264	0.205	2.708	171717	10.449	36320010	2.708	0.205
2	TRIM24.2790.jpeg-(Colour_2)	278470	0.414	0.244	0.186	2.708	115295	7.966	30844461	2.708	0.186
3	TRIM24.3203.jpeg-(Colour_2)	443048	0.507	0.259	0.189	2.708	224774	12.674	40618548	2.708	0.189
4	TRIM24.1609.png-(Colour_2)	701099	0.061	0.024	0.039	2.407	42460.3	20.056	155724303	2.708	0.039
5	TRIM24.3643.png-(Colour_2)	718186	0.068	0.024	0.041	0.691	48718.8	20.544	156883535	2.708	0.041
6	TRIM24.3732.png-(Colour_2)	482396	0.069	0.026	0.041	1.407	33429.3	13.799	105046254	2.708	0.041
statistics-TRIM24
	Table Analyzed	Data 1
	Column B	Glioma
	vs.	vs.
	Column A	Normal
	Unpaired t test
	P value	0.0001
	P value summary	***
	Significantly different (P < 0.05)?	Yes
	One- or two-tailed P value?	Two-tailed
	t, df	t=14.65, df=4
	How big is the difference?
	Mean of column A	0.066
	Mean of column B	0.4637
	Difference between means (B - A) ± SEM	0.3977 ± 0.02715
	95% confidence interval	0.3223 to 0.4730
	R squared (eta squared)	0.9817
	F test to compare variances
	F, DFn, Dfd	115.4, 2, 2
	P value	0.0172
	P value summary	*
	Significantly different (P < 0.05)?	Yes
	Data analyzed
	Sample size, column A	3
	Sample size, column B	3

## Sheet: part-2 IDH1
image J-IDH1
	Label	Area	Mean	StdDev	Min	Max	IntDen	%Area	RawIntDen	MinThr	MaxThr
1	3739.IDH1.png-(Colour_2)	743648	0.067	0.021	0.041	1.009	49558.8	21.273	162839675	2.708	0.041
2	3740 IDH1.52.女1.png-(Colour_2)	1082743	0.116	0.037	0.062	1.708	125707	30.973	212037475	2.708	0.062
3	IDH.3731.png-(Colour_2)	857931	0.065	0.019	0.041	0.6	55655.7	24.542	188585615	2.708	0.041
4	1--Patient id_ 2879 女.65.png-(Colour_2)	942017	0.181	0.058	0.088	1.503	170832	26.947	159542916	2.708	0.088
5	2---Patient id_ 2879 女 65.下载.png-(Colour_2)	1313015	0.17	0.056	0.088	1.151	223255	37.56	228131397	2.708	0.088
6	Patient id_ 2862.女.40IDH1.png-(Colour_2)	645832	0.183	0.08	0.093	1.365	117990	18.475	109767983	2.708	0.093
statistics-IDH1
Table Analyzed	Data 1
Column B	Glioma
vs.	vs.
Column A	Normal
Unpaired t test
P value	0.0051
P value summary	**
Significantly different (P < 0.05)?	Yes
One- or two-tailed P value?	Two-tailed
t, df	t=5.556, df=4
How big is the difference?
Mean of column A	0.08267
Mean of column B	0.178
Difference between means (B - A) ± SEM	0.09533 ± 0.01716
95% confidence interval	0.04769 to 0.1430
R squared (eta squared)	0.8853
F test to compare variances
F, DFn, Dfd	17.03, 2, 2
P value	0.1109
P value summary	ns
Significantly different (P < 0.05)?	No
Data analyzed
Sample size, column A	3
Sample size, column B	3

## Sheet: part-3 LBR
image J-LBR
	Label	Area	Mean	StdDev	Min	Max	IntDen	%Area	RawIntDen	MinThr	MaxThr
7	3740.png-(Colour_2)	1141590	0.173	0.066	0.086	2.708	197750	32.656	197300574	2.708	0.086
8	Patient id_ 1371下载.png-(Colour_2)	1048996	0.136	0.06	0.072	2.708	142331	30.008	197242299	2.708	0.072
9	Patient id_ 3720.png-(Colour_2)	1018068	0.175	0.066	0.088	2.708	178168	29.123	175233436	2.708	0.088
10	1-122下载.png-(Colour_2)	766185	0.281	0.155	0.121	2.708	215317	21.918	107159900	2.708	0.121
11	2-122.png-(Colour_2)	755167	0.29	0.163	0.123	2.708	219125	21.602	103879545	2.708	0.123
12	Patient id_ 3226.png-(Colour_2)	510331	0.287	0.158	0.128	2.708	146284	14.599	70910753	2.708	0.128
statistics-LBR
	Table Analyzed	Data 1
	Column B	Glioma
	vs.	vs.
	Column A	Normal
	Unpaired t test
	P value	0.0007
	P value summary	***
	Significantly different (P < 0.05)?	Yes
	One- or two-tailed P value?	Two-tailed
	t, df	t=9.625, df=4
	How big is the difference?
	Mean of column A	0.1613
	Mean of column B	0.286
	Difference between means (B - A) ± SEM	0.1247 ± 0.01295
	95% confidence interval	0.08870 to 0.1606
	R squared (eta squared)	0.9586
	F test to compare variances
	F, DFn, Dfd	22.97, 2, 2
	P value	0.0834
	P value summary	ns
	Significantly different (P < 0.05)?	No
	Data analyzed
	Sample size, column A	3
	Sample size, column B	3

## Sheet: part-4 HMG20B
image J-HMG20B
	Label	Area	Mean	StdDev	Min	Max	IntDen	%Area	RawIntDen	MinThr	MaxThr
1	2-HPA069832__Male; age 37__Cerebral cortex (T-X2020)__Normal tissue; NOS (M-00100)__Patient id_ 3731.png-(Colour_2)	1243589	0.085	0.029	0.052	1.26	105928	35.574	261185333	2.708	0.052
2	HPA069832__Female; age 52__Cerebral cortex (T-X2020)__Normal tissue; NOS (M-00100)__Patient id_ 3740.png-(Colour_2)	1227732	0.085	0.025	0.052	0.915	104226	35.121	257881809	2.708	0.052
3	HPA069832__Male; age 71__Cerebral cortex (T-X2020)__Glioma; malignant; High grade (M-938033)__Normal tissue; NOS (M-00100)__Patient id_ 1532.png-(Colour_2)	786208	0.089	0.033	0.054	1.503	70131.3	22.49	163686827	2.708	0.054
4	HPA069832__Female; age 32__Brain (T-X2000)__Glioma; malignant; Low grade (M-938031)__Patient id_ 122.png-(Colour_2)	744183	0.146	0.086	0.076	1.628	108352	21.288	137803080	2.708	0.076
5	HPA069832__Female; age 71__Brain (T-X2000)__Glioma; malignant; NOS (M-93803)__Glioma; malignant; High grade (M-938033)__Patient id_ 5479 (1).png-(Colour_2)	210525	0.306	0.16	0.144	1.561	64335.6	6.022	28117313	2.708	0.144
6	HPA069832__Female; age 71__Brain (T-X2000)__Glioma; malignant; NOS (M-93803)__Glioma; malignant; High grade (M-938033)__Patient id_ 5479.png-(Colour_2)	366292	0.313	0.166	0.154	2.407	114480	10.478	48279985	2.708	0.154
statistics-HMG20B
Table Analyzed	Data 1
Column B	Glioma
vs.	vs.
Column A	Normal
Unpaired t test
P value	0.0365
P value summary	*
Significantly different (P < 0.05)?	Yes
One- or two-tailed P value?	Two-tailed
t, df	t=3.092, df=4
How big is the difference?
Mean of column A	0.08633
Mean of column B	0.255
Difference between means (B - A) ± SEM	0.1687 ± 0.05455
95% confidence interval	0.01720 to 0.3201
R squared (eta squared)	0.705
F test to compare variances
F, DFn, Dfd	1673, 2, 2
P value	0.0012
P value summary	**
Significantly different (P < 0.05)?	Yes
Data analyzed
Sample size, column A	3
Sample size, column B	3

## Sheet: part-5 USP49
image J-USP49
	Label	Area	Mean	StdDev	Min	Max	IntDen	%Area	RawIntDen	MinThr	MaxThr
1	HPA030254__Female; age 30__Cerebral cortex (T-X2020)__Developmental malformation (M-20000)__Normal tissue; NOS (M-00100)__Patient id_ 1582.png-(Colour_2)	1304106	0.138	0.05	0.074	1.628	180513	37.305	243207206	2.708	0.074
2	HPA030254__Male; age 54__Cerebral cortex (T-X2020)__Normal tissue; NOS (M-00100)__Patient id_ 3643.png-(Colour_2)	946099	0.132	0.05	0.07	2.708	125345	27.064	178845083	2.708	0.07
3	HPA030254__Male; age 57__Cerebral cortex (T-X2020)__Normal tissue; NOS (M-00100)__Patient id_ 2927.png-(Colour_2)	1138806	0.178	0.065	0.091	2.407	202759	32.577	194639369	2.708	0.091
4	HPA030254__Female; age 57__Brain (T-X2000)__Glioma; malignant; High grade (M-938033)__Patient id_ 2843.png-(Colour_2)	921115	0.231	0.072	0.11	1.503	212545	26.349	139882062	2.708	0.11
5	HPA030254__Male; age 33__Brain (T-X2000)__Glioma; malignant; High grade (M-938033)__Patient id_ 3251.png-(Colour_2)	989787	0.274	0.136	0.126	2.708	270855	28.314	139578562	2.708	0.126
6	Zoom inZoom inZoom outZoom outGo homeGo home__100 μm__Glioma__HPA030254__Male; age 33__Brain (T-X2000)__Glioma; malignant; High grade (M-938033)__Patient id_ 3251.png-(Colour_2)	795053	0.248	0.117	0.121	2.708	196987	22.743	118067020	2.708	0.121
statistics-USP49
Table Analyzed	Data 1
Column B	Glioma
vs.	vs.
Column A	Normal
Unpaired t test
P value	0.006
P value summary	**
Significantly different (P < 0.05)?	Yes
One- or two-tailed P value?	Two-tailed
t, df	t=5.323, df=4
How big is the difference?
Mean of column A	0.1493
Mean of column B	0.251
Difference between means (B - A) ± SEM	0.1017 ± 0.01910
95% confidence interval	0.04864 to 0.1547
R squared (eta squared)	0.8763
F test to compare variances
F, DFn, Dfd	1.333, 2, 2
P value	0.8571
P value summary	ns
Significantly different (P < 0.05)?	No
Data analyzed
Sample size, column A	3
Sample size, column B	3

## Sheet: part-6 RCC11
image J-RCC1
	Label	Area	Mean	StdDev	Min	Max	IntDen	%Area	RawIntDen	MinThr	MaxThr
1	HPA027573__Male, age 57__Cerebral cortex (T-X2020)__Normal tissue, NOS (M-00100)__Patient id_ 2927下载.png-(Colour_2)	56835	0.106	0.056	0.066	1.452	6033.44	1.626	11431977	2.708	0.066
2	Male, age 54__Cerebral cortex (T-X2020)__Normal tissue, NOS (M-00100)__Patient id_ 3643下载.png-(Colour_2)	49379	0.12	0.076	0.068	2.708	5917.04	1.413	9671965	2.708	0.068
3	Feamle 1582 hpa027573下载.png-(Colour_2)	44868	0.157	0.072	0.088	1.045	7023.91	1.352	8076149	2.708	0.088
4	HPA027573__Male, age 72__Brain (T-X2000)__Glioma, malignant, High grade (M-938033)__Patient id_ 2527 (1).png-(Colour_2)	245251	0.409	0.234	0.179	2.708	100331	7.016	27161465	2.708	0.179
5	HPA027573__Male, age 72__Brain (T-X2000)__Glioma, malignant, High grade (M-938033)__Patient id_ 2527.png-(Colour_2)	339759	0.376	0.203	0.171	2.708	127839	9.719	39650062	2.708	0.171
6	HPA027573__Male, age 38__Brain (T-X2000)__Glioma, malignant, Low grade (M-938031)__Patient id_ 3120载.png-(Colour_2)	198684	0.194	0.105	0.097	2.708	38633.1	5.684	33177470	2.708	0.097
statistics-RCC1
Table Analyzed	Data 1
Column B	Data Set-B
vs.	vs.
Column A	Data Set-A
Unpaired t test
P value	0.0442
P value summary	*
Significantly different (P < 0.05)?	Yes
One- or two-tailed P value?	Two-tailed
t, df	t=2.898, df=4
How big is the difference?
Mean of column A	0.1277
Mean of column B	0.3263
Difference between means (B - A) ± SEM	0.1987 ± 0.06856
95% confidence interval	0.008319 to 0.3890
R squared (eta squared)	0.6773
F test to compare variances
F, DFn, Dfd	19.31, 2, 2
P value	0.0985
P value summary	ns
Significantly different (P < 0.05)?	No
Data analyzed
Sample size, column A	3
Sample size, column B	3
